# Supplementary material
Source: PubMed Central journal article supplement (PMC8769089)
Supplement: 10541_2022_2271_MOESM1_ESM.pdf [file 10541_2022_2271_MOESM1_ESM.pdf]

## SUPPLEMENT

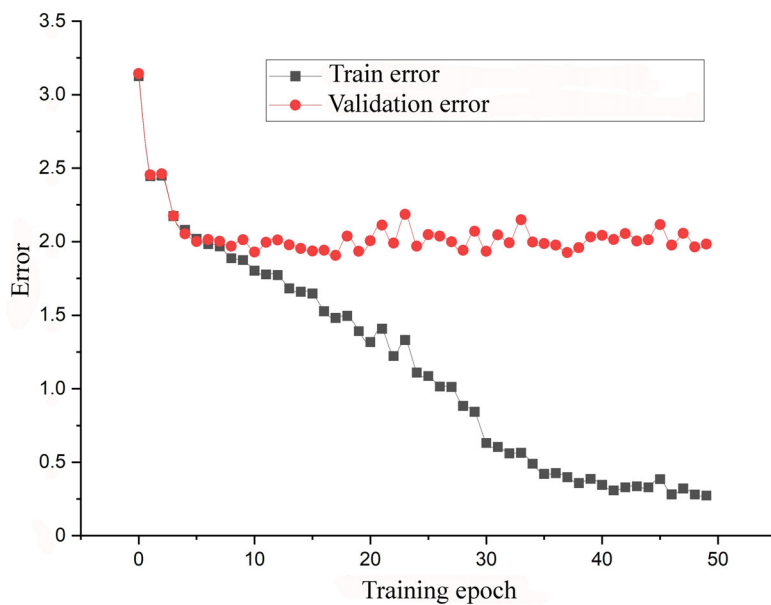

**Fig. S1.** Training curves of the Pafnucy neural network on the PDBbind2020 set. For modeling, the coefficients of the 25th epoch were selected.

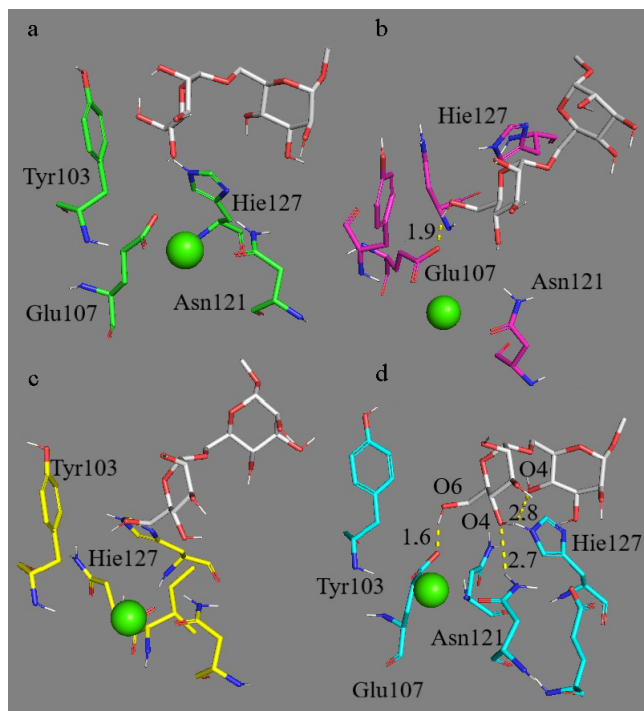

**Fig. S2.** Modeling of dimannose **8** binding by the domain of the mannose receptor CD206. The following complexes are shown: the initial arrangement (a) and the arrangement after 10-ns (b), 30-ns (c), and 250-ns (d) molecular dynamics simulation. The green sphere is Ca<sup>2+</sup>.

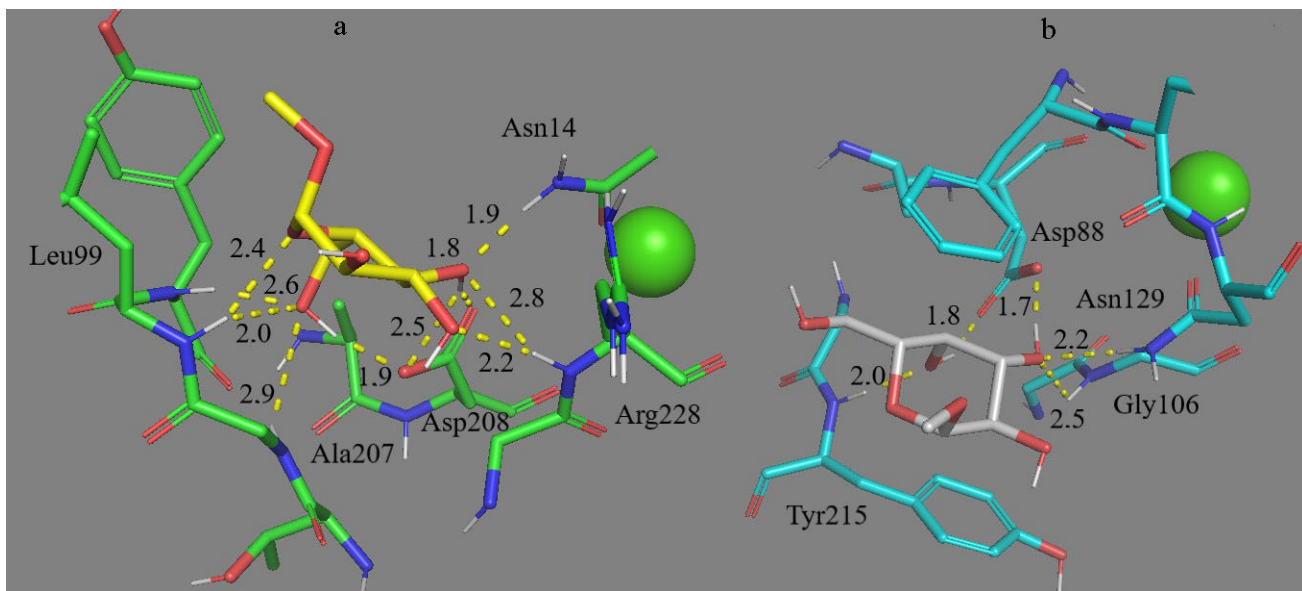

**Fig. S3.** Spatial structures of ConA complexes with monosaccharides: a) methyl- $\alpha$ -D-glucopyranoside **12** (yellow); b) methyl- $\alpha$ -D-galactopyranoside **13** (white). The green sphere is  $\text{Ca}^{2+}$ . Molecular dynamics within 10 ns.

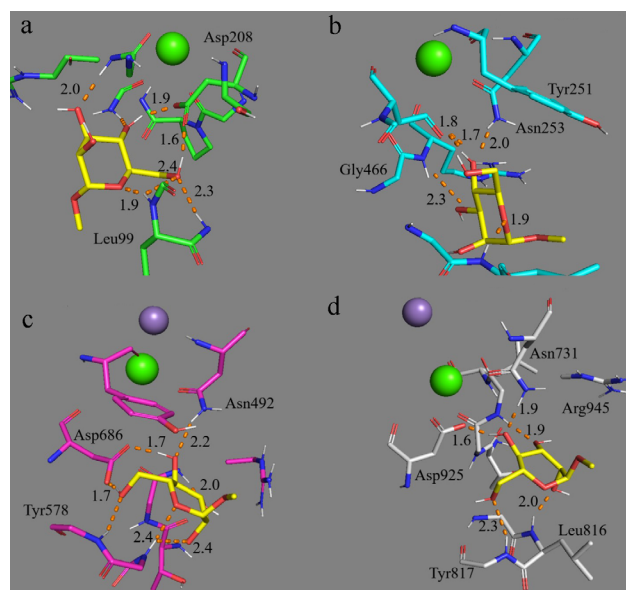

**Fig. S4.** Spatial structures of the ConA subunit complexes with methyl- $\alpha$ -D-mannoside **2** (shown in yellow): a) Subunit A; b) subunit B; c) subunit C; d) subunit D. The green sphere is  $\text{Ca}^{2+}$ . Molecular dynamics within 10 ns.

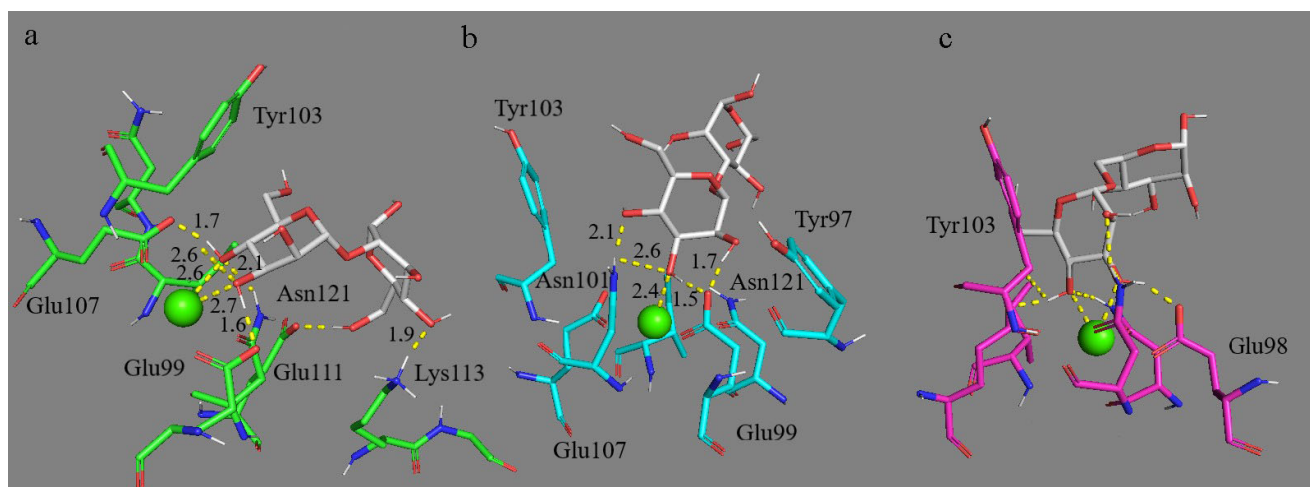

**Fig. S5.** Effect of the glycoside type on dimannose binding by the fourth domain of the mannose receptor CD206. a)  $\alpha(1,2)$ -dimannopyranoside **4**; b)  $\alpha(1,3)$ -dimannopyranoside **6**; c)  $\alpha(1,6)$ -dimannopyranoside **7**. 100-ns molecular dynamics simulation.

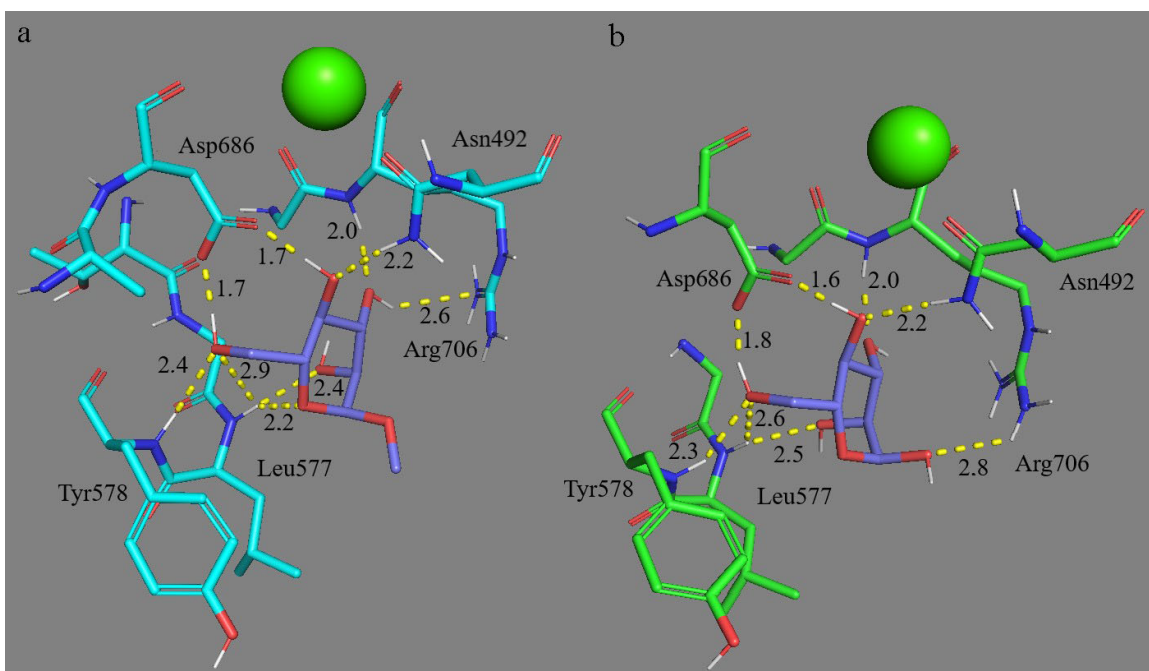

**Fig. S6.** Effect of the O1 atom methylation on binding mannose by concanavalin A. a)  $\alpha$ -Mannose **1** [PDB – 5CNA]; b) Me- $\alpha$ -mannopyranoside **2** [PDB – 5CNA]. 10-ns molecular dynamics simulation.

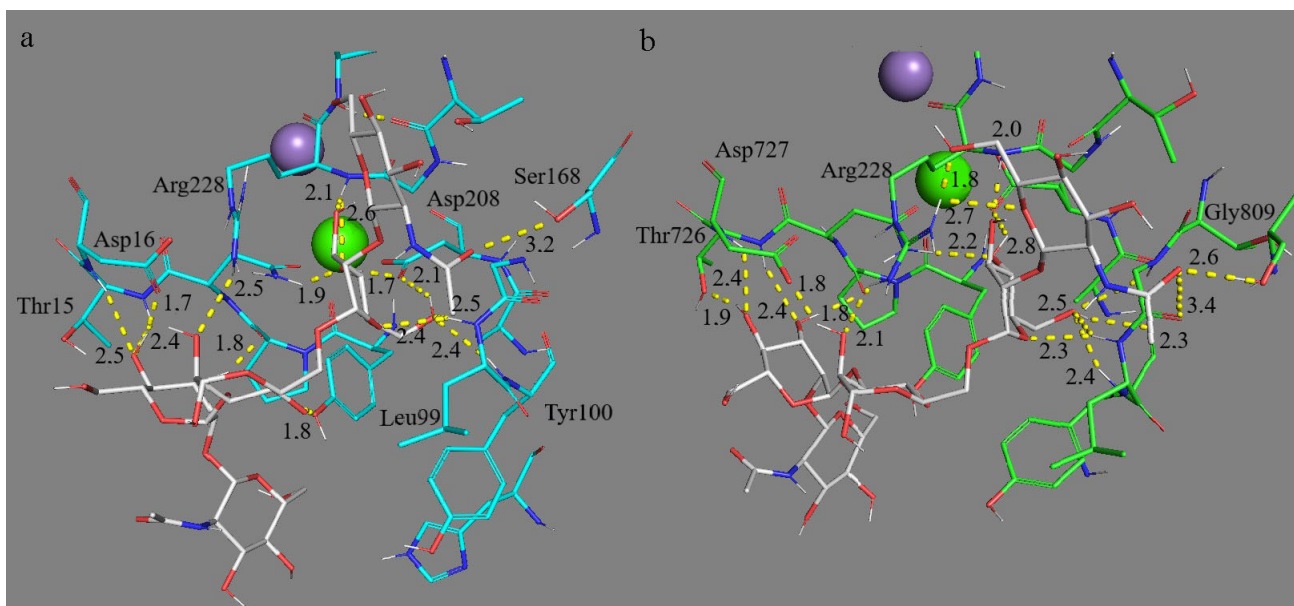

**Fig. S7.** Spatial structures of ConA subunit complexes with 3,6-di-O-( $\beta$ (1,2)-N-acetylglucosamino-mannopyranosyl)- $\alpha$ -mannopyranose **11** [PDB – 1TEI] (shown in white): Subunit A (a); subunit D (b). The green sphere is  $\text{Ca}^{2+}$ , the purple sphere is  $\text{Mn}^{2+}$ . 10-ns molecular dynamics simulation.

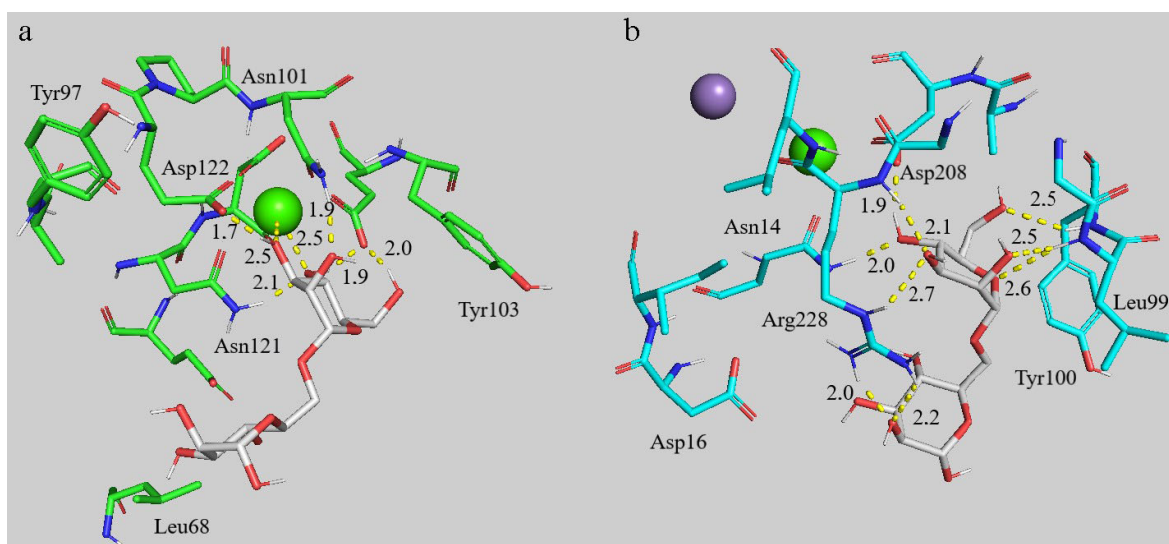

**Fig. S8.** Spatial structures of complexes of  $\alpha$ (1,6)-dimannopyranoside **7** with the fourth domain of the mannose receptor CD206 (a) and with ConA (b). 10/100-ns molecular dynamics simulation.
