# Supplementary material
Source: PubMed Central journal article supplement (PMC8769089)
Supplement: 10541_2022_2271_MOESM2_ESM.pdf [file 10541_2022_2271_MOESM2_ESM.pdf]

**Table S1.** Correlation coefficients of Gibbs energy values of ligand–receptor complexation

| Epoch | 20   | 21   | 22   | 23   | 24   | 25           | 26           | 27           | 28   | 29   |
|-------|------|------|------|------|------|--------------|--------------|--------------|------|------|
| ConA  | 0.74 | 0.58 | 0.63 | 0.45 | 0.46 | <b>0.82*</b> | <b>0.69*</b> | <b>0.78*</b> | 0.69 | 0.69 |
| CD206 | 0.82 | 0.77 | 0.73 | 0.59 | 0.43 | 0.55         | <b>0.83*</b> | <b>0.80*</b> | 0.55 | 0.72 |

Note. Values obtained by the neural network analysis in comparison with the literature data, which confirm relevance of the Pafnucy neural network training on the PDBbind2020 set. The epochs 20-29 are chosen (Fig. S1).

\* The most accurate sequential predictions are marked in bold.

**Table S2.** Thermodynamic parameters of ConA complexation with carbohydrate ligands

| No. | Name of ligand, PDB code of the complex with ConA, and Fig. number                                                   | Energies of ConA–ligand complexation, kcal/mol |      |      |      |      |      |      |      |      |      |      |      |           |                   |      |     |
|-----|----------------------------------------------------------------------------------------------------------------------|------------------------------------------------|------|------|------|------|------|------|------|------|------|------|------|-----------|-------------------|------|-----|
|     |                                                                                                                      | MD1                                            |      |      |      | MD2  |      |      |      | MD3  |      |      |      | MD – mean | MD – stand. error | REF. | NN  |
|     |                                                                                                                      | A                                              | B    | C    | D    | A    | B    | C    | D    | A    | B    | C    | D    |           |                   |      |     |
| 1   | $\alpha$ -mannopyranose [5CNA]                                                                                       | 10.7                                           | 24.0 | 10.6 | 11.8 | 19.8 | 12.2 | 11.1 | 30.0 | 13.5 | 20.6 | 19.3 | 10.5 | 16.2      | 2.0               | 4.0  | 6.0 |
| 2   | Me-mannopyranoside [5CNA]; Fig. S3                                                                                   | 21.5                                           | 21.5 | 26.8 | 22.0 | 18.3 | 22.3 | 25.5 | 15.3 | 22.0 | 20.6 | 21.2 | 12.7 | 20.8      | 2.0               | 5.2  | 6.4 |
| 3   | Me- $\alpha$ (1 $\rightarrow$ 2)-dimannopyranoside [1BXH]; Fig. 4                                                    | 43.8                                           |      | 47.7 |      | 39.2 |      | 19.4 |      | 29.5 |      | 42.0 |      | 36.9      | 8.3               | 7.0  | 7.2 |
| 4   | $\alpha$ (1 $\rightarrow$ 2)-dimannopyranoside [1BXH]; Fig. S4                                                       | 38.9                                           |      | 39.4 |      | 25.8 |      | 31.5 |      | 41.2 |      | 31.7 |      | 34.8      | 5.5               | 6.3  | 6.4 |
| 5   | Me- $\alpha$ (1 $\rightarrow$ 3)-dimannopyranoside [1QDO/C]; Fig. 4                                                  | 47.4                                           | 44.8 | 46.9 | 44.6 | 37.9 | 39.6 | 37.4 | 38.1 | 36.6 | 39.7 | 37.2 | 40.2 | 40.9      | 4.4               | 6.2  | 7.2 |
| 6   | $\alpha$ (1 $\rightarrow$ 3)-dimannopyranoside; Fig. S4                                                              | 42.0                                           | 43.4 | 40.6 | 42.2 | 39.8 | 40.3 | 37.0 | 33.7 | 39.0 | 37.9 | 36.1 | 47.6 | 39.9      | 2.2               | 5.7  | 7.0 |
| 7   | $\alpha$ (1 $\rightarrow$ 6)-dimannopyranoside; Fig. S4, S7                                                          | 34.4                                           | 40.5 | 36.6 | 38.4 | 28.7 | 42.2 | 32.2 | 43.9 | 33.8 | 29.5 | 37.4 | 32.6 | 35.8      | 2.2               | 5.6  | 6.6 |
| 8   | Me- $\alpha$ (1 $\rightarrow$ 6)-dimannopyranoside; Fig. 4                                                           | 35.8                                           | 35.9 | 36.4 | 37.8 | 27.7 | 39.6 | 42.9 | 37.6 | 43.8 | 37.2 | 24.8 | 47.4 | 37.2      | 1.0               | 5.3  | 7.0 |
| 9   | Me-3,6-di-O-(mannopyranosyl)- $\alpha$ -mannopyranoside [1ONA]                                                       | 53.9                                           | 46.7 | 52.6 | 44.3 | 34.5 | 36.3 | 44.4 | 52.7 | 38.4 | 53.2 | 43.8 | 39.8 | 45.1      | 3.9               | 7.8  | 7.0 |
| 10  | 3,6-di-O-(mannopyranosyl)- $\alpha$ -mannopyranose; Fig. 2                                                           | 42.9                                           | 48.2 | 45.6 | 45.6 | 33.9 | 37.2 | 39.0 | 38.3 | 31.4 | 40.8 | 37.1 | 39.4 | 40.0      | 4.9               | 7.5  | 7.4 |
| 11  | 3,6-di-O-( $\alpha$ (1 $\rightarrow$ 2)-N-acetylglucosamino-mannopyranosyl)- $\alpha$ -mannopyranose [1TEI]; Fig. S6 | 50.9                                           | 50.1 | 48.6 | 60.2 | 42.0 | 50.1 | 48.8 | 69.4 | 48.2 | 50.1 | 46.1 | 60.6 | 52.1      | 0.7               | 8.4  | 7.8 |
| 12  | Me- $\alpha$ -glucopyranoside [1GIC]                                                                                 | 16.0                                           |      | 23.7 |      | 21.6 |      | 17.2 |      | 23.7 |      | 23.6 |      | 20.9      | 2.3               | 4.4  | 5.1 |
| 13  | Me- $\alpha$ -galactopyranoside [1GIC]                                                                               | 33.7                                           | 43.4 | 30.1 | 28.7 | 34.1 | 25.2 | 33.9 | 33.7 | 26.6 | 41.6 | 28.0 | 28.1 | 32.3      | 1.5               | 4.5  | 6.0 |
| 14  | Me-GlcNAc                                                                                                            | 41.4                                           | 36.9 | 45.4 | 45.1 | 43.7 | 42.4 | 43.8 | 40.0 | 40.8 | 41.5 | 42.0 | 42.6 | 42.1      | 0.4               | 3.9  | 6.6 |
| 15  | Fuc- $\alpha$ (1 $\rightarrow$ 3)-GlcNAc                                                                             | 52.0                                           | 49.9 | 43.7 | 51.4 | 42.7 | 43.6 | 52.2 | 48.8 | 53.4 | 53.9 | 51.5 | 49.9 | 49.4      | 2.7               | –    | 6.5 |

Note. The values were calculated using computer simulation (Pafnucy neural network, 10-ns molecular dynamics simulation – Amber20 and mm/pbsa) in comparison with the literature data (REF) [20-21, 26]. The initial values of energies (kcal/mol) after three cycles of molecular dynamics simulation (MD) and data of neural network analysis (NN) are presented. The energy values obtained by the MD method are presented for four subunits.

**Table S3.** Thermodynamic parameters of complexation of CRD4 of CD206 with carbohydrate ligands

| No. | Name of ligand and Fig. number                                                                            | Complexation energies of CD206–ligand, kcal/mol |       |      |           |                   |     |      |
|-----|-----------------------------------------------------------------------------------------------------------|-------------------------------------------------|-------|------|-----------|-------------------|-----|------|
|     |                                                                                                           | MD1                                             | MD2   | MD3  | MD – mean | MD – stand. error | REF | NN   |
| 1   | $\alpha$ -mannopyranose [5CNA]; Fig. 5, Fig. S5                                                           | 25.6                                            | 27.3  | 27.2 | 26.7      | 1.0               |     | 5.2  |
| 2   | Me-mannopyranoside [5CNA]                                                                                 | 32.8                                            | 32.5  | 34.5 | 33.3      | 1.1               | 3.6 | 5.9  |
| 3   | Me- $\alpha$ (1 $\rightarrow$ 2)-dimannopyranoside [1BXH]                                                 | 54.7                                            | 56.4  | 54.4 | 55.2      | 1.1               |     | 13.3 |
| 4   | $\alpha$ (1 $\rightarrow$ 2)-dimannopyranoside [1BXH]                                                     | 50.9                                            | 41.9  | 37.6 | 43.5      | 6.8               | 4.0 | 6.4  |
| 5   | Me- $\alpha$ (1 $\rightarrow$ 3)-dimannopyranoside [1QDO/C]                                               | 66.7                                            | 51.2  | 45.1 | 54.3      | 11.1              |     | 5.6  |
| 6   | $\alpha$ (1 $\rightarrow$ 3)-dimannopyranoside                                                            | 63.2                                            | 51.3  | 59.0 | 57.8      | 6.0               | 3.6 | 6.3  |
| 7   | $\alpha$ (1 $\rightarrow$ 6)-dimannopyranoside                                                            | 41.9                                            | 41.5  | 40.9 | 41.4      | 0.5               | 4.1 | 6.5  |
| 8   | Me- $\alpha$ (1 $\rightarrow$ 6)-dimannopyranoside; Fig. S2                                               | 59.9                                            | 75.8  | 46.8 | 60.8      | 14.5              |     | 6.6  |
| 9   | Me-3,6-di-O-(mannopyranosyl)- $\alpha$ -mannopyranoside [1ONA]                                            | 76.9                                            | 86.4  | 57.8 | 73.7      | 14.6              |     | 5.6  |
| 10  | 3,6-di-O-(mannopyranosyl)- $\alpha$ -mannopyranose                                                        | 76.9                                            | 92.1  | 92.5 | 87.2      | 8.9               | 4.2 | 7.9  |
| 11  | 3,6-di-O-( $\beta$ (1 $\rightarrow$ 2)-N-acetylglucosaminomannopyranosyl)- $\alpha$ -mannopyranose [1TEI] | 120.1                                           | 112.9 | 88.7 | 107.2     | 16.5              |     | 7.2  |
| 12  | Me- $\alpha$ -glucopyranoside [1GIC]; Fig. S2                                                             | 37.4                                            | 37.3  | 34.6 | 36.5      | 1.6               |     | 4.2  |
| 13  | Me- $\alpha$ -galactopyranoside [1GIC]; Fig. 3, Fig. S2                                                   | 38.9                                            | 34.6  | 35.4 | 36.3      | 2.3               |     | 5.3  |
| 14  | Me-GlcNAc                                                                                                 | 41.7                                            | 41.9  | 39.7 | 41.1      | 1.2               | 3.1 | 5.0  |
| 15  | Fuc- $\alpha$ (1 $\rightarrow$ 3)-GlcNAc                                                                  | 44.6                                            | 43.5  | 42.7 | 43.6      | 1.0               |     | 6.7  |

Note. The values were calculated using computer simulation (Pafnucy neural network, 100-ns molecular dynamics simulation – Amber20 and mm/pbsa) in comparison with the literature data (REF) [13, 52-53]. The initial values of energies (kcal/mol) of three cycles of molecular dynamics (MD) and data of neural network analysis (NN) are presented.
